# Supplementary material for: PvMSP8 as a Novel Plasmodium vivax Malaria Sero-Marker for the Peruvian Amazon
Source: PubMed Central journal article supplement (PMC7999794; doi:10.3390/pathogens10030282), 2021-03-02

## Supplemental Material

**Table S1. Baseline characteristics of cohort participants (N = 422)**

|                                    | Total |      | Cahuide |      | Lupuna |      |
|------------------------------------|-------|------|---------|------|--------|------|
|                                    | N     | %    | n=258   | %    | n=164  | %    |
| <b>Gender</b>                      |       |      |         |      |        |      |
| Female                             | 232   | 55.1 | 143     | 55.4 | 90.0   | 54.9 |
| Male                               | 189   | 44.9 | 115     | 44.6 | 74     | 45.1 |
| <b>Age groups (years)</b>          |       |      |         |      |        |      |
| <15                                | 219   | 51.9 | 129     | 50.0 | 90     | 54.9 |
| >15                                | 203   | 48.1 | 129     | 50.0 | 74     | 45.1 |
| <b>Main occupation (≥18 years)</b> |       |      |         |      |        |      |
| None                               | 82    | 19.4 | 45      | 17.4 | 37     | 22.6 |
| Labourer                           | 23    | 5.5  | 18      | 7.0  | 5      | 3.0  |
| Logger or lumberjack               | 14    | 3.3  | 11      | 4.3  | 3      | 1.8  |
| Fishermen                          | 0     | 0.0  | 0       | 0.0  | 0      | 0.0  |
| Breeder                            | 4     | 0.9  | 4       | 1.6  | 0      | 0.0  |
| Farmer                             | 49    | 11.6 | 31      | 12.0 | 18     | 11.0 |
| Trader                             | 15    | 3.6  | 11      | 4.3  | 4      | 2.4  |
| Housewife                          | 65    | 15.4 | 39      | 15.1 | 26     | 15.9 |
| Student                            | 168   | 39.8 | 98      | 38.0 | 70     | 42.7 |
| Other                              | 2     | 0.5  | 1       | 0.4  | 1      | 0.6  |

**Table S2. Baseline characteristics of cross-sectional study participants (N=1,251)**

|                                    | <b>Total</b> |          | <b>Primero de Enero</b> |          | <b>Urco Mirano</b> |          | <b>Libertad</b> |          | <b>Puerto Alegre</b> |          | <b>Salvador</b> |          | <b>Gamitanacocha</b> |          | <b>Lago Yuracyacu</b> |          |
|------------------------------------|--------------|----------|-------------------------|----------|--------------------|----------|-----------------|----------|----------------------|----------|-----------------|----------|----------------------|----------|-----------------------|----------|
|                                    | <b>n</b>     | <b>%</b> | <b>n=93</b>             | <b>%</b> | <b>n=223</b>       | <b>%</b> | <b>n=230</b>    | <b>%</b> | <b>n=192</b>         | <b>%</b> | <b>n=334</b>    | <b>%</b> | <b>n=70</b>          | <b>%</b> | <b>n=109</b>          | <b>%</b> |
| <b>Gender</b>                      |              |          |                         |          |                    |          |                 |          |                      |          |                 |          |                      |          |                       |          |
| <b>Female</b>                      | 643          | 51.4     | 41                      | 44.1     | 109                | 48.9     | 112             | 48.7     | 98                   | 51.0     | 182             | 54.5     | 44                   | 62.9     | 57                    | 52.3     |
| <b>Male</b>                        | 608          | 48.6     | 52                      | 55.9     | 114                | 51.1     | 118             | 51.3     | 94                   | 49.0     | 152             | 45.5     | 26                   | 37.1     | 52                    | 47.7     |
| <b>Age groups (years)</b>          |              |          |                         |          |                    |          |                 |          |                      |          |                 |          |                      |          |                       |          |
| <b>&lt;15</b>                      | 634          | 50.7     | 45                      | 48.4     | 117                | 52.5     | 101             | 43.9     | 103                  | 53.6     | 178             | 53.3     | 33                   | 47.1     | 57                    | 52.3     |
| <b>≥15</b>                         | 617          | 49.3     | 48                      | 51.6     | 106                | 47.5     | 129             | 56.1     | 89                   | 46.4     | 156             | 46.7     | 37                   | 52.9     | 52                    | 47.7     |
| <b>Main occupation (≥18 years)</b> |              |          |                         |          |                    |          |                 |          |                      |          |                 |          |                      |          |                       |          |
| <b>None</b>                        | 257          | 20.5     | 15                      | 16.1     | 43                 | 19.3     | 65              | 28.3     | 29                   | 15.1     | 61              | 18.3     | 19                   | 27.1     | 25                    | 22.9     |
| <b>Labourer</b>                    | 1            | 0.1      | 0                       | 0.0      | 0                  | 0.0      | 0               | 0.0      | 0                    | 0.0      | 0               | 0.0      | 0                    | 0.0      | 1                     | 0.9      |
| <b>Logger or lumberjack</b>        | 6            | 0.5      | 1                       | 1.1      | 0                  | 0.0      | 2               | 0.9      | 3                    | 1.6      | 0               | 0.0      | 0                    | 0.0      | 0                     | 0.0      |
| <b>Fishermen</b>                   | 16           | 1.3      | 0                       | 0.0      | 0                  | 0.0      | 3               | 1.3      | 3                    | 1.6      | 0               | 0.0      | 0                    | 0.0      | 10                    | 9.2      |
| <b>Breeder</b>                     | 1            | 0.1      | 0                       | 0.0      | 0                  | 0.0      | 0               | 0.0      | 0                    | 0.0      | 0               | 0.0      | 0                    | 0.0      | 1                     | 0.9      |
| <b>Farmer</b>                      | 435          | 34.8     | 35                      | 37.6     | 76                 | 34.1     | 95              | 41.3     | 68                   | 35.4     | 111             | 33.2     | 29                   | 41.4     | 21                    | 19.3     |
| <b>Trader</b>                      | 5            | 0.4      | 0                       | 0.0      | 0                  | 0.0      | 0               | 0.0      | 1                    | 0.5      | 2               | 0.6      | 0                    | 0.0      | 2                     | 1.8      |
| <b>Housewife</b>                   | 53           | 4.2      | 3                       | 3.2      | 4                  | 1.8      | 14              | 6.1      | 8                    | 4.2      | 15              | 4.5      | 2                    | 2.9      | 7                     | 6.4      |
| <b>Student</b>                     | 465          | 37.2     | 38                      | 40.9     | 97                 | 43.5     | 49              | 21.3     | 79                   | 41.1     | 141             | 42.2     | 20                   | 28.6     | 41                    | 37.6     |
| <b>Other</b>                       | 12           | 1.0      | 1                       | 1.1      | 3                  | 1.3      | 2               | 0.9      | 1                    | 0.5      | 4               | 1.2      | 0                    | 0.0      | 1                     | 0.9      |

**Table S3. Participants from the cross-sectional study classified by age groups and exposure condition (N=1,251)**

|                           |                                        | <b>Total</b> |          | <b>Primero de Enero</b> |          | <b>Urco Mirano</b> |          | <b>Libertad</b> |          | <b>Puerto Alegre</b> |          | <b>Salvador</b> |          | <b>Gamitanacocha</b> |          | <b>Lago Yuracyacu</b> |          |
|---------------------------|----------------------------------------|--------------|----------|-------------------------|----------|--------------------|----------|-----------------|----------|----------------------|----------|-----------------|----------|----------------------|----------|-----------------------|----------|
|                           |                                        |              | <b>%</b> | n=93                    | <b>%</b> | n=223              | <b>%</b> | n=230           | <b>%</b> | n=192                | <b>%</b> | n=334           | <b>%</b> | n=70                 | <b>%</b> | n=109                 | <b>%</b> |
| <b>Age groups (years)</b> | <b>First definition*</b>               |              |          |                         |          |                    |          |                 |          |                      |          |                 |          |                      |          |                       |          |
| <b>&lt;15</b>             | Non-exposed                            | 603          | 48.2     | 42                      | 45.2     | 115                | 51.6     | 85              | 37.0     | 100                  | 52.1     | 176             | 52.7     | 28                   | 40.0     | 57                    | 52.3     |
|                           | Exposed                                | 31           | 2.5      | 3                       | 3.2      | 2                  | 0.9      | 16              | 7.0      | 3                    | 1.6      | 2               | 0.6      | 5                    | 7.1      | 0                     | 0.0      |
| <b>≥15</b>                | Non-exposed                            | 567          | 45.3     | 44                      | 47.3     | 103                | 46.2     | 109             | 47.4     | 83                   | 43.2     | 151             | 45.2     | 28                   | 40.0     | 49                    | 45.0     |
|                           | Exposed                                | 50           | 4.0      | 4                       | 4.3      | 3                  | 1.3      | 20              | 8.7      | 6                    | 3.1      | 5               | 1.5      | 9                    | 12.9     | 3                     | 2.8      |
|                           | <b>Second definition°</b>              |              |          |                         |          |                    |          |                 |          |                      |          |                 |          |                      |          |                       |          |
| <b>&lt;15</b>             | Non-exposed                            | 587          | 46.9     | 40                      | 43.0     | 115                | 51.6     | 76              | 33.0     | 100                  | 52.1     | 176             | 52.7     | 24                   | 34.3     | 56                    | 51.4     |
|                           | Exposed                                | 47           | 3.8      | 5                       | 5.4      | 2                  | 0.9      | 25              | 10.9     | 3                    | 1.6      | 2               | 0.6      | 9                    | 12.9     | 1                     | 0.9      |
| <b>≥15</b>                | Non-exposed                            | 553          | 44.2     | 40                      | 43.0     | 103                | 46.2     | 104             | 45.2     | 80                   | 41.7     | 151             | 45.2     | 27                   | 38.6     | 48                    | 44.0     |
|                           | Exposed                                | 64           | 5.1      | 8                       | 8.6      | 3                  | 1.3      | 25              | 10.9     | 9                    | 4.7      | 5               | 1.5      | 10                   | 14.3     | 4                     | 3.7      |
|                           | <b>Malaria antecedent (past month)</b> |              |          |                         |          |                    |          |                 |          |                      |          |                 |          |                      |          |                       |          |
| <b>&lt;15</b>             | No                                     | 616          | 49.2     | 43                      | 46.2     | 117                | 52.5     | 90              | 39.1     | 103                  | 53.6     | 178             | 53.3     | 29                   | 41.4     | 56                    | 51.4     |
|                           | Yes                                    | 18           | 1.4      | 2                       | 2.2      | 0                  | 0.0      | 11              | 4.8      | 0                    | 0.0      | 0               | 0.0      | 4                    | 5.7      | 1                     | 0.9      |
| <b>≥15</b>                | No                                     | 603          | 48.2     | 44                      | 47.3     | 106                | 47.5     | 124             | 53.9     | 86                   | 44.8     | 156             | 46.7     | 36                   | 51.4     | 51                    | 46.8     |
|                           | Yes                                    | 14           | 1.1      | 4                       | 4.3      | 0                  | 0.0      | 5               | 2.2      | 3                    | 1.6      | 0               | 0.0      | 1                    | 1.4      | 1                     | 0.9      |

\* First definition of *P. vivax* exposure was a positive *P. vivax* result (by microscopy and/or PCR) at the time of sample collection

° Second definition included individuals with a positive result and/or the antecedent of *P. vivax* malaria in the past month (red line).

**Figure S1: Variation of sensitivity (Sn), specificity (Sp), positive likelihood ratio (PLR) and negative likelihood ratio (NLR) with the cutoff used to determine seropositivity.**

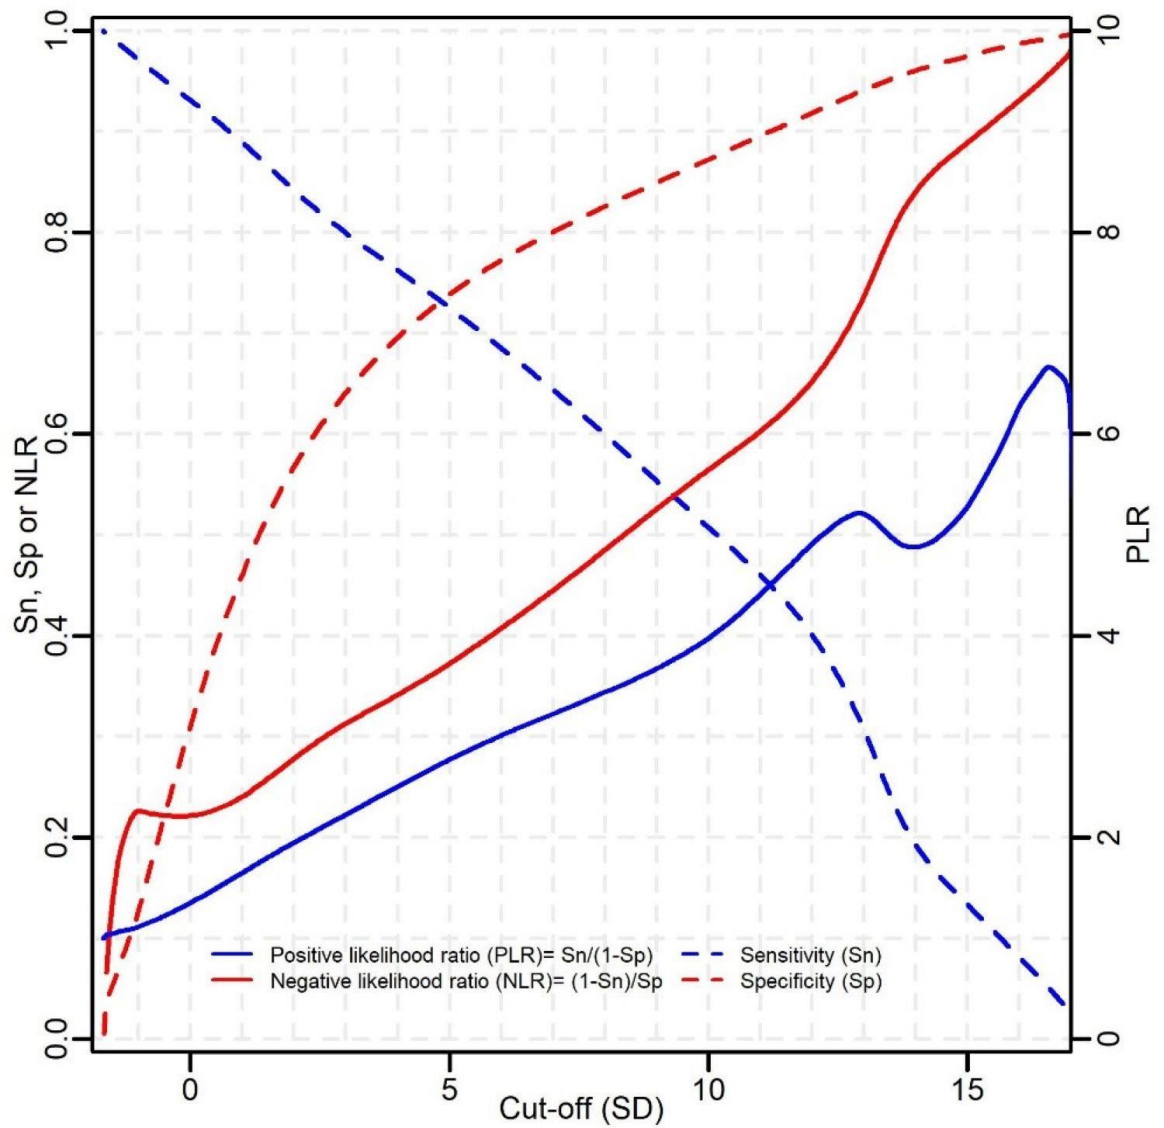

**Figure S2: Misclassification/error rates (MER) of dichotomized serological responses to PvMSP8, in discriminating *P. vivax* exposure.** (A) Variation of MER with cutoff used to determine seropositivity; (B) variation of false negatives (FN) and false positive (FP) rates with the cutoff used to determine seropositivity.

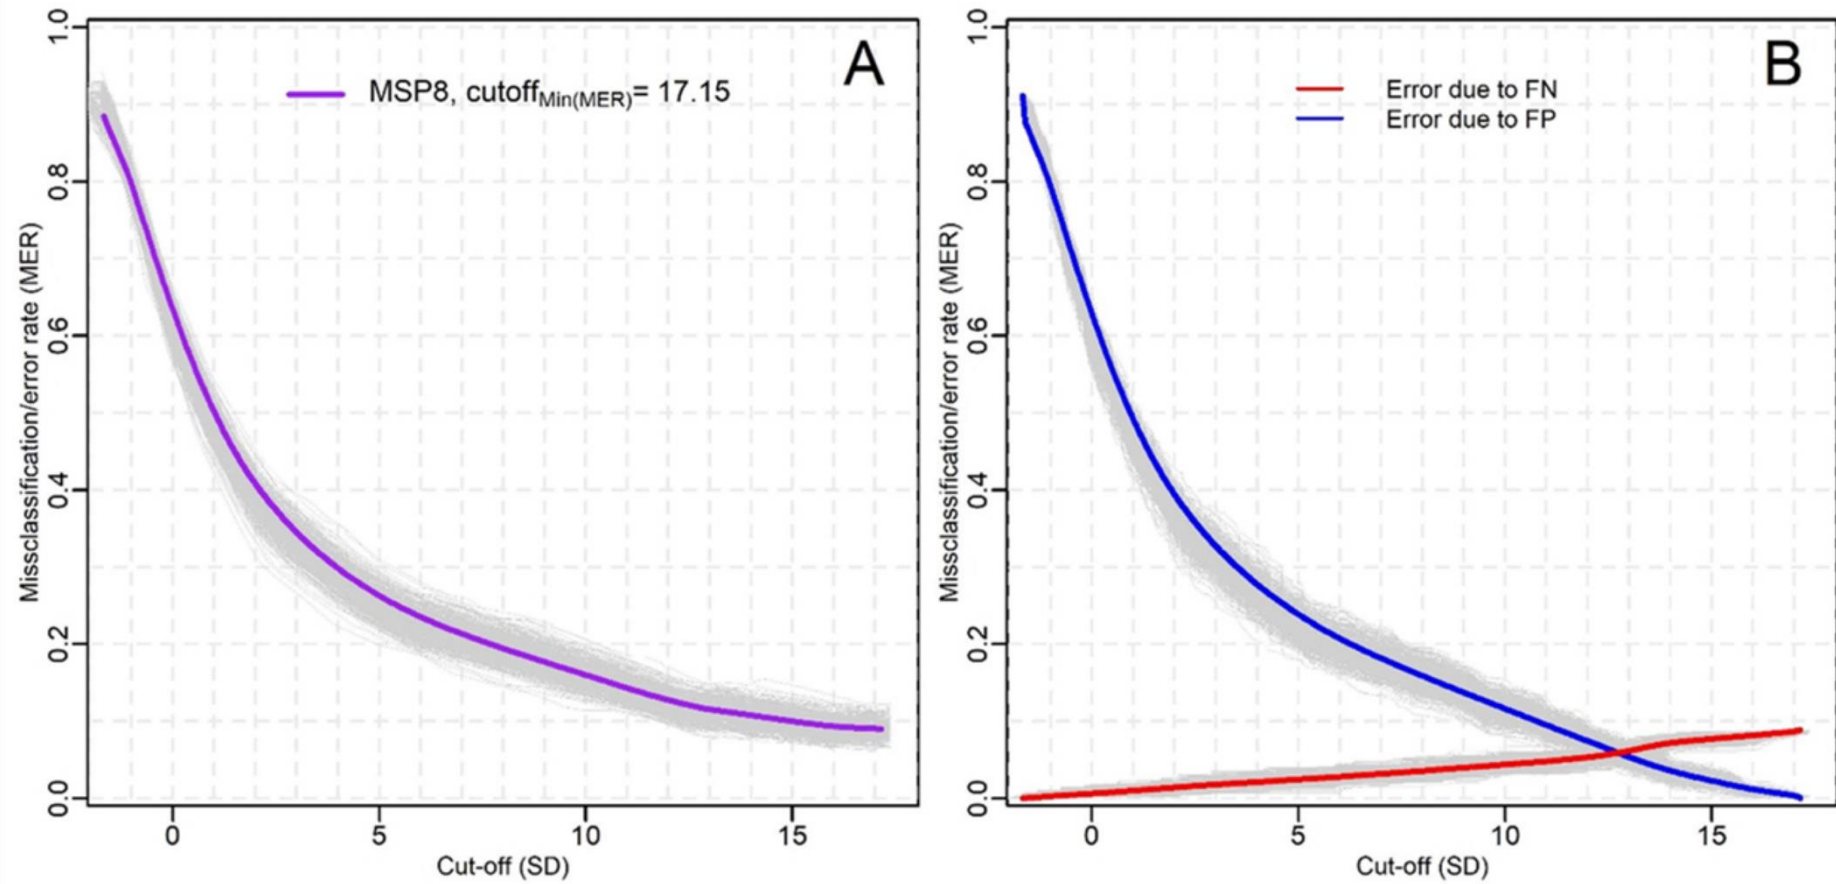

**Figure S3: Misclassification/error rates (MER) and misclassification cost rates of dichotomized serological responses to MSP8 in discriminating *P. vivax* exposure:**

(A) Variation of MER with the cutoff used to determine seropositivity, assuming different *P. vivax* exposure prevalence; (B) variation of MCR with cutoff used to determine seropositivity, assuming different cost ratios between false negatives (FN) and false positives (FP).

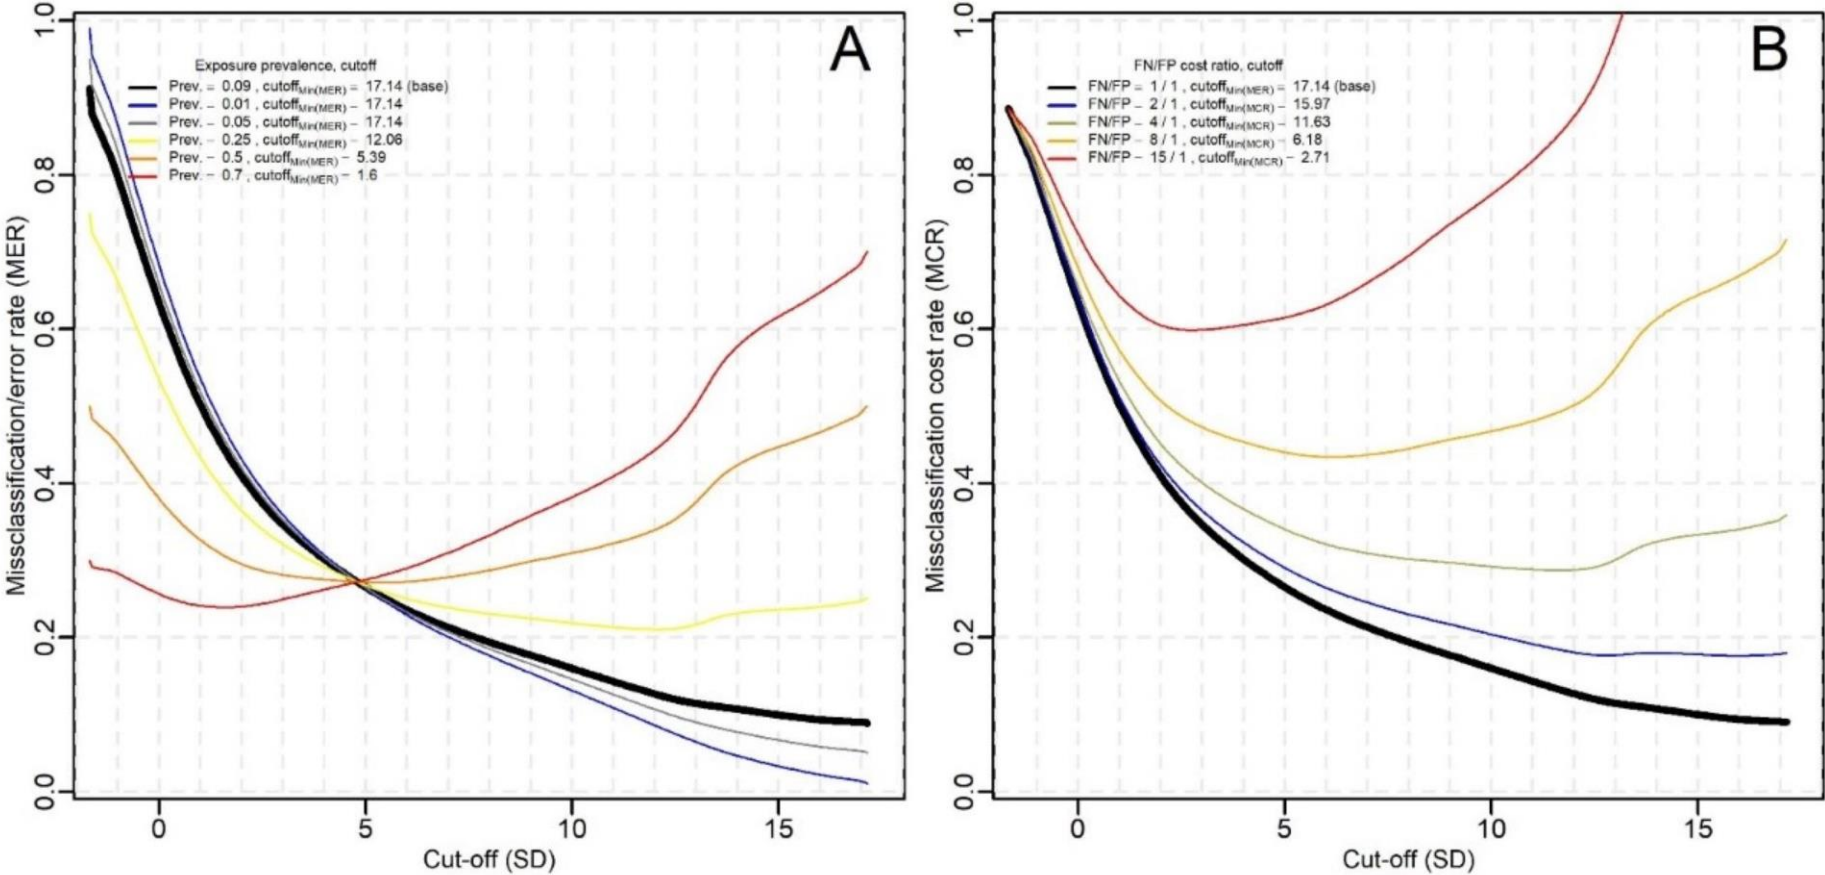

Supplement: pathogens-10-00282-s001.pdf [file pathogens-10-00282-s001.pdf]
